# Supplementary material
Source: MDPI journal article supplement (https://www.mdpi.com/2073-4441/15/13/2363)
Supplement: s1 [file s1]

## Supplementary Materials

**Table S1.** Data Recovery and Completeness in Owasco & Seneca Lakes (% Deployment)

| Owasco               | Weather Station | Water Temperature | Camera | Sondes | Buoy - Met | Buoy - WQ |
|----------------------|-----------------|-------------------|--------|--------|------------|-----------|
| 2019 - Martin N (E1) | 2.0             | 0.0               | 0.0    | n.a.   | 0.0        | 0.9       |
| 2019 - Burtis Pt (D) | 0.1             | 0.0               | 0.0    | n.a.   |            |           |
| 2020 - Martin N (E1) | 0.1             | 0.0               | 0.0    | 0.0    | 0.0        | 0.9       |
| 2020 - Burtis Pt (D) | 0.1             | 0.0               | 0.0    | 0.0    |            |           |
| 2020 - Martin N (E1) | 45.5            | 0.0               | 0.0    | 0.1    |            |           |
| 2020 - FL-20 (A)     | 23.5            | 23.4              | 25.0   | 64.4   |            |           |
| 2021 - Martin N (E1) | 0.5             | 0.0               | 0.0    | 0.0    | 0.0        | 1.9       |
| 2021 - Burtis Pt (D) | 0.1             | 0.0               | 19.0   | 0.0    |            |           |
| 2021 - Martin S (E2) | 21.6            | 0.0               | 0.0    | 0.0    |            |           |
| 2021 - FL-20 (A)     | 24.7            | 24.5              | 26.0   | 0.0    |            |           |
| 2022 - Martin N (E1) | 2.0             | 0.0               | 0.0    | 0.0    | 1.0        | 0.9       |
| 2022 - Burtis Pt (D) | 0.0             | 0.0               | 21.3   | 0.0    |            |           |
| 2022 - Martin S (E2) | 86.2            | 3.3               | 0.0    | 3.8    |            |           |
| 2022 - FL-20 (A)     | 37.9            | 0.0               | 0.0    | 0.0    |            |           |
| Owasco Combined      | 17.5            | 3.7               | 6.5    | 5.7    | 0.3        | 1.2       |
| Seneca               |                 |                   |        |        |            |           |
| 2019 - I             | 0.1             | 0.0               | 0.0    | n.a.   | 0.0        | 4.3       |
| 2019 - H*            | 0.0             | 0.0               | 0.0    | n.a.   |            |           |
| 2019 - G             | 0.2             | 0.0               | 1.0    | n.a.   |            |           |
| 2019 - F*            | 0.2             | 0.0               | 0.0    | n.a.   |            |           |
| 2019 - B             | 0.4             | 0.0               | 17.0   | n.a.   |            |           |
| 2019 - C             | 2.3             | 0.0               | 74.0   | n.a.   |            |           |
| 2019 - D             | 1.4             | 0.0               | 0.0    | n.a.   |            |           |
| 2019 - E             | 2.0             | 0.0               | 0.0    | n.a.   |            |           |
| 2020 - I             | 0.2             | 0.0               | 32.6   | n.a.   | 0.0        | 0.5       |
| 2020 - H             | 0.1             | 0.0               | 74.4   | n.a.   |            |           |
| 2020 - G             | 0.4             | 0.0               | 0.0    | n.a.   |            |           |
| 2020 - A             | 14.0            | 12.7              | 8.1    | n.a.   |            |           |
| 2020 - B             | 0.2             | 0.0               | 1.2    | n.a.   |            |           |
| 2020 - C             | 0.5             | 0.0               | 30.2   | n.a.   |            |           |
| 2020 - D             | 1.6             | 0.0               | 0.0    | n.a.   |            |           |
| 2020 - E             | 0.2             | 0.0               | 47.7   | n.a.   |            |           |
| 2021 - I             | 1.7             | 0.0               | 0.0    | n.a.   |            |           |
| 2021 - H             | 0.0             | 0.0               | 0.0    | n.a.   |            |           |
| 2021 - G             | 0.7             | 0.0               | 29.3   | n.a.   |            |           |

|                 |     |     |      |      |     |     |
|-----------------|-----|-----|------|------|-----|-----|
| 2021 - A        | 0.1 | 0.0 | 0.0  | n.a. | 0.0 | 2.8 |
| 2021 - B        | 0.2 | 0.0 | 0.0  | n.a. |     |     |
| 2021 - C        | 0.0 | 0.0 | 13.8 | n.a. |     |     |
| 2021 - D        | 0.1 | 0.0 | 17.4 | n.a. |     |     |
| 2021 - E        | 0.0 | 0.0 | 32.1 | n.a. |     |     |
| Seneca Combined | 1.1 | 0.5 | 15.8 | n.a. | 0.0 | 2.5 |

\*Site Moved

**Table S2.** Deployment Dates and Blooms Detected by Cameras & Volunteers

| Year | Lake   | Site             | Deployment Dates | Dock Cameras | Volunteers w/in 1 Mile |
|------|--------|------------------|------------------|--------------|------------------------|
|      |        |                  |                  |              |                        |
| 2019 | Seneca | FLI Buoy         | Spr - Fall       |              |                        |
|      |        | I                | 6/23 - 10/7      | 3            | 1                      |
|      |        | H*               | 6/21 - 10/8      | 2            | 0                      |
|      |        | G                | 6/21 - 10/7      | 0            | 1                      |
|      |        | F*               | 6/21 - 10/8      | 1            | 0                      |
|      |        | B                | 6/22 - 10/8      | 1            | 2                      |
|      |        | C                | 6/21 - 10/4      | 2            | 2                      |
|      |        | D                | 6/24 - 10/6      | 2            | 1                      |
|      |        | E                | 6/24 - 10/11     | 1            | 3                      |
|      |        | Blooms All Sites |                  | 12           | 10                     |
| 2020 | Seneca | USGS Buoy        | Spr - Fall       |              |                        |
|      |        | I                | 7/8 - 10/10      | 5            | 2                      |
|      |        | H                | 7/8 - 10/10      | 0            | 0                      |
|      |        | G                | 7/9 - 10/10      | 0            | 0                      |
|      |        | A                | 7/8 - 10/9       | 0            | 0                      |
|      |        | B                | 7/8 - 10/10      | 1            | 0                      |
|      |        | C                | 7/8 - 10/10      | 1            | 0                      |
|      |        | D                | 7/22 - 10/10     | 0            | 0                      |
|      |        | E                | 7/9 - 10/9       | 0            | 1                      |
|      |        | Blooms All Sites |                  | 7            | 3                      |
| 2021 | Seneca | FLI Buoy         | Spr - Fall       |              |                        |
|      |        | I                | 7/26 - 10/27     | 9            | 1                      |
|      |        | H                | 7/24 - 10/27     | 4            | 0                      |
|      |        | G                | 7/12 - 10/27     | 3            | 2                      |
|      |        | A                | 7/12 - 10/27     | 7            | 5                      |
|      |        | B                | 7/12 - 10/27     | 5            | 9                      |
|      |        | C                | 7/12 - 10/27     | 1            | 8                      |
|      |        | D                | 7/12 - 10/27     | 4            | 4                      |
|      |        | E                | 7/12 - 10/27     | 8            | 7                      |
|      |        | Blooms All Sites |                  | 41           | 36                     |
|      |        |                  |                  |              |                        |
| 2019 | Owasco | FLI Buoy         | Spr - Fall       |              |                        |
|      |        | Martin N (E1)    | 6/26 - 10/3      | 10           | 3                      |
|      |        | Burtis (D)       | 6/26 - 10/9      | 14           | 1                      |
|      |        | Blooms All Sites |                  | 24           | 4                      |
| 2020 | Owasco | FLI Buoy         | Spr - Fall       |              |                        |

|      |        |                  |              |    |   |
|------|--------|------------------|--------------|----|---|
|      |        | Martin N (E1)    | 7/7 - 10/14  | 9  | 1 |
|      |        | Martin S (E2)    | 7/9 - 8/31   | 17 | 2 |
|      |        | Burtis (D)       | 7/7 - 10/14  | 12 | 0 |
|      |        | FL-20 (A)        | 7/7 - 9/18   | 0  | 0 |
|      |        | Blooms All Sites |              | 38 | 3 |
| 2021 | Owasco | FLI Buoy         | Spr - Fall   |    |   |
|      |        | Martin N (E1)    | 7/7 - 10/12  | 10 | 2 |
|      |        | Martin S (E2)    | 7/28 - 10/13 | 7  | 2 |
|      |        | Burtis (D)       | 7/7 - 10/13  | 10 | 1 |
|      |        | FL-20 (A)        | 7/7 - 9/17   | 3  | 0 |
|      |        | Blooms All Sites |              | 30 | 5 |
| 2022 | Owasco | FLI Buoy         | Spr - Fall   |    |   |
|      |        | Martin N (E1)    | 7/20 - 10/5  | 3  | 2 |
|      |        | Martin S (E2)    | 9/24 - 10/5  | 1  | 1 |
|      |        | Burtis (D)       | 7/20 - 10/5  | 3  | 0 |
|      |        | FL-20 (A)        | 7/20 - 10/5  | 2  | 0 |
|      |        | Blooms All Sites |              | 9  | 3 |

\*Site Moved

**Table S3.** Data Means, Standard Deviations, and Maximum Values

| Year | Lake             | Site             | Water Temperature, °C | Wind Speed, kph  | Air Temperature, °C  | Light Intensity, W/m <sup>2</sup> |
|------|------------------|------------------|-----------------------|------------------|----------------------|-----------------------------------|
|      |                  |                  | mean ± sd, max        | mean ± sd, max   | mean ± sd, max       | mean ± sd, max                    |
| 2019 | Seneca           | FLI Buoy         | 20.2 ± 5.3, 26.2      | 14.3 ± 8.1, 42.9 | 21.6 ± 4.9, 43.7     | 225.6 ± 311.1, 1260.6             |
|      |                  | I                | 21.4 ± 3.1, 33.2      | 4.2 ± 5.8, 33.5  | 19.3 ± 4.8, 32.6     | 82.3 ± 121.4, 703.9               |
|      |                  | H*               | 21.4 ± 2.8, 27.5      | 9.2 ± 9.6, 41.0  | 19.4 ± 4.7, 32.8     | 128.5 ± 190.6, 748.4              |
|      |                  | G                | 21.3 ± 2.3, 26.7      | 3.4 ± 5.4, 47.5  | 19.3 ± 4.8, 33.4     | 309.8 ± 501.4, 2761               |
|      |                  | F*               | 21.8 ± 3.0, 27.2      | 3.2 ± 5.2, 42.2  | 19.0 ± 5.1, 33.4     | 120.7 ± 187.3, 880.5              |
|      |                  | B                | 21.7 ± 2.7, 28.7      | 5.3 ± 8.2, 68.7  | 19.5 ± 5.0, 33.5     | 116.9 ± 173.0, 1027.6             |
|      |                  | C                | 21.6 ± 2.6, 28.1      | 1.2 ± 1.9, 17.2  | 19.4 ± 5.0, 33.1     | 114.0 ± 189.5, 944.7              |
|      |                  | D                | 21.4 ± 2.5, 28.3      | 2.2 ± 3.8, 32.0  | 19.1 ± 4.7, 32.2     | 90.5 ± 140.0, 786.8               |
|      |                  | E                | 20.8 ± 2.3, 27        | 3.5 ± 5.6, 34.6  | 19.3 ± 4.8, 33.1     | 396.3 ± 619.1, 3328               |
|      | Blooms All Sites | 21.2 ± 2.6, 26.7 | 0.8 ± 1.4, 21.6       | 21.0 ± 2.9, 28.4 | 252.7 ± 185.4, 751.1 |                                   |
| 2020 | Seneca           | USGS Buoy        | 23.0 ± 3.3, 26.7      | 15.4 ± 8.8, 55.8 | 20.6 ± 5.0, 33.3     | 228.1 ± 312.9, 1254.5             |
|      |                  | I                | 22.4 ± 4.0, 26.5      | 4.7 ± 6.3, 39.9  | 20.3 ± 5.5, 33.8     | 97.7 ± 142.1, 805                 |
|      |                  | H                | 22.2 ± 3.7, 28.8      | 9.0 ± 9.4, 56.2  | 20.4 ± 5.4, 33.7     | 168.1 ± 234.1, 938.3              |
|      |                  | G                | 22.1 ± 3.4, 29.0      | 4.2 ± 5.8, 39.6  | 20.3 ± 5.5, 32.7     | 156.1 ± 221.1, 933.1              |
|      |                  | A                | 22.7 ± 4.5, 30.6      | 3.3 ± 4.9, 35.6  | 19.3 ± 5.8, 33.9     | 153.2 ± 221.1, 941.0              |
|      |                  | B                | 22.9 ± 3.6, 29.8      | 5.4 ± 9.3, 76.3  | 20.3 ± 5.7, 34.4     | 150.4 ± 205.1, 857.6              |
|      |                  | C                | 22.8 ± 3.7, 28.9      | 0.5 ± 1.6, 19.5  | 20.2 ± 5.9, 34.6     | 143.3 ± 197.7, 961.7              |
|      |                  | D                | 22.4 ± 3.6, 29.2      | 3.0 ± 4.4, 28.0  | 20.1 ± 5.5, 34.1     | 125.6 ± 186.9, 797.5              |
|      |                  | E                | 21.6 ± 3.5, 28.7      | 3.9 ± 5.6, 36.0  | 20.2 ± 5.7, 35.6     | 157.4 ± 212.8, 1000.0             |
|      |                  |                  | Blooms All Sites      | 24.9 ± 1.7, 27.4 | 6.4 ± 5.4, 21.6      | 22.4 ± 2.8, 36.5                  |
| 2021 | Seneca           | FLI Buoy         | 21.4 ± 3.1, 26.7      | 14.3 ± 8.1, 42.9 | 21.6 ± 4.9, 43.7     | 225.6 ± 311.1, 1260.6             |
|      |                  | I                | 21.9 ± 3.1, 28.8      | 4.2 ± 5.8, 33.5  | 19.3 ± 4.8, 32.6     | 82.3 ± 121.4, 703.9               |
|      |                  | H                | 21.6 ± 2.9, 33.3      | 9.2 ± 9.6, 41.0  | 19.4 ± 4.7, 32.8     | 128.5 ± 190.6, 748.4              |
|      |                  | G                | 21.2 ± 2.8, 26.9      | 3.4 ± 5.4, 47.5  | 19.3 ± 4.8, 33.4     | 309.8 ± 501.4, 2761               |
|      |                  | A                | 20.8 ± 2.8, 27.5      | 3.2 ± 5.2, 42.2  | 19.0 ± 5.1, 33.4     | 120.7 ± 187.3, 880.5              |

|  |                  |                  |                 |                  |                       |
|--|------------------|------------------|-----------------|------------------|-----------------------|
|  | B                | 22.3 ± 2.8, 27.4 | 5.3 ± 8.2, 68.7 | 19.5 ± 5.0, 33.5 | 116.9 ± 173.0, 1027.6 |
|  | C                | 22.1 ± 2.9, 27.0 | 1.2 ± 1.9, 17.2 | 19.4 ± 5.0, 33.1 | 114.0 ± 189.5, 944.7  |
|  | D                | 21.6 ± 2.9, 27.6 | 2.2 ± 3.8, 32.0 | 19.1 ± 4.7, 32.2 | 90.5 ± 140.0, 786.8   |
|  | E                | 20.8 ± 2.9, 27.6 | 3.5 ± 5.6, 34.6 | 19.3 ± 4.8, 33.1 | 396.3 ± 619.1, 3328   |
|  | Blooms All Sites | 21.3 ± 2.4, 26.4 | 3.8 ± 4.8, 5.3  | 20.7 ± 4.4, 28.4 | 345.4 ± 238.1, 658.0  |

|      |        |                  |                  |                  |                  |                       |
|------|--------|------------------|------------------|------------------|------------------|-----------------------|
| 2019 | Owasco | FLI Buoy         | 21.7 ± 3.1, 25.9 | 14.0 ± 8.2, 54.4 | 20.1 ± 4.3, 31.6 | 195.8 ± 267.9, 1129.0 |
|      |        | Martin N (E1)    | 22.1 ± 3.0, 28.7 | 3.4 ± 4.8, 48.6  | 20.1 ± 4.5, 35.0 | 153.4 ± 231.6, 898    |
|      |        | Burtis (D)       | 22.0 ± 3.0, 29.0 | 6.0 ± 6.5, 39.6  | 19.3 ± 5.0, 34.8 | 190.6 ± 277.1, 1025   |
|      |        | Blooms All Sites | 23.7 ± 2.8, 27.6 | 4.3 ± 4.8, 24.5  | 22.0 ± 4.2, 28.8 | 480.6 ± 261.7, 909.8  |
| 2020 | Owasco | FLI Buoy         | 20.8 ± 4.3, 26.6 | 15.0 ± 8.4, 48.7 | 20.2 ± 5.2, 33.1 | 194.7 ± 262.3, 1014.0 |
|      |        | Martin N (E1)    | 22.6 ± 3.8, 28.7 | 4.9 ± 6.2, 38.5  | 19.7 ± 5.8, 35.0 | 144.0 ± 215.6, 898    |
|      |        | Martin S (E2)    | 22.7 ± 3.7, 28.6 | 4.8 ± 5.2, 29.4  | 22.5 ± 3.6, 31.7 | 175.5 ± 261.0, 914.8  |
|      |        | Burtis (D)       | 22.3 ± 4.0, 39.0 | 6.9 ± 7.5, 50.0  | 19.4 ± 5.9, 34.8 | 164.8 ± 240.6, 1025   |
|      |        | FL-20 (A)        | 24.3 ± 2.0, 28.2 | 3.0 ± 4.0, 39.4  | 21.1 ± 4.3, 33.1 | 201.0 ± 299.7, 1179.4 |
|      |        | Blooms All Sites | 20.5 ± 2.0, 28.2 | 2.4 ± 3.9, 23.3  | 19.9 ± 4.4, 31.4 | 346.2 ± 210.4, 736.2  |
| 2021 | Owasco | FLI Buoy         | 22.1 ± 2.0, 25.6 | 14.2 ± 7.8, 43.6 | 20.5 ± 3.7, 30.5 | 168.7 ± 239.0, 1031.0 |
|      |        | Martin N (E1)    | 22.4 ± 2.2, 28.2 | 3.9 ± 5.2, 32.0  | 20.0 ± 4.3, 35.0 | 116.3 ± 177.4, 884    |
|      |        | Martin S (E2)    | 22.4 ± 2.2, 28.9 | 4.9 ± 5.0, 29.1  | 19.7 ± 4.2, 31.9 | 127.5 ± 207.5, 911.7  |
|      |        | Burtis (D)       | 22.3 ± 2.5, 28.1 | 5.9 ± 6.7, 37.5  | 19.8 ± 4.3, 33.9 | 127.8 ± 180.4, 897.1  |
|      |        | FL-20 (A)        | 23.0 ± 1.2, 27.5 | 2.7 ± 3.7, 39.4  | 20.4 ± 3.8, 30.8 | 158.3 ± 238.7, 1041.9 |
|      |        | Blooms All Sites | 22.4 ± 2.6, 26.3 | 2.2 ± 3.4, 18.3  | 21.5 ± 4.0, 27.8 | 213.3 ± 161.8, 631.3  |
| 2022 | Owasco | FLI Buoy         | 22.5 ± 2.7, 25.6 | 13.4 ± 6.8, 37.0 | 20.0 ± 5.0, 32.6 | 176.6 ± 246.7, 1044.0 |
|      |        | Martin N (E1)    | 23.2 ± 2.8, 29.0 | 4.1 ± 5.2, 29.9  | 19.5 ± 5.5, 32.1 | 124.5 ± 189.7, 814.6  |
|      |        | Martin S (E2)    | 23.4 ± 2.5, 29.3 | 3.7 ± 5.7, 22.4  | 11.8 ± 3.8, 19.2 | 67.9 ± 135.6, 783.4   |
|      |        | Burtis (D)       | 22.7 ± 3.1, 28.1 | 6.3 ± 6.9, 43.1  | 19.4 ± 5.6, 32.9 | 119.4 ± 167.3, 804.9  |
|      |        | FL-20 (A)        | 22.9 ± 2.3, 27.4 | 3.1 ± 4.1, 22.4  | 19.5 ± 5.7, 32.9 | 142.9 ± 226.3, 950.9  |
|      |        | Blooms All Sites | 20.1 ± 2.7, 25.7 | 3.6 ± 4.9, 19.5  | 16.0 ± 4.4, 25.8 | 327.4 ± 172.1, 635.5  |

\*Site Moved
